# Supplementary material for: Antimicrobial resistance and the Iraq wars: armed conflict as an underinvestigated pathway with growing significance
Source: PubMed Central journal article supplement — BMJ Glob Health. 2023 Jan 6;7(Suppl 8):e010863. doi: 10.1136/bmjgh-2022-010863 (PMC9933488; doi:10.1136/bmjgh-2022-010863), 2023-01-06
Supplement: bmjgh-2022-010863supp001.pdf [file bmjgh-2022-010863supp001.pdf]

Supplementary Table 1: Timeline of antimicrobial resistance in Iraq (1980-2017)

|                       | Year | Key findings on antimicrobial resistance in Iraq                                                                                                                                                                                                                                                                                                     |
|-----------------------|------|------------------------------------------------------------------------------------------------------------------------------------------------------------------------------------------------------------------------------------------------------------------------------------------------------------------------------------------------------|
| Iran-Iraq War         | 1983 | 90% of strains of <i>E. coli</i> , <i>Pseudomonas</i> spp. and <i>Staphylococcus</i> spp. samples from the river Tigris in Mosul are found to be resistant to one or more antibiotics [a]                                                                                                                                                            |
|                       | 1984 | Basrah University Teaching Hospital reports high rates of bacteremia caused by <i>E. coli</i> , <i>K. pneumoniae</i> , <i>Staphylococcus</i> spp. and salmonella spp., with 31.3% of isolates resistant to all but three antibiotics. There has been no detection of <i>Acinetobacter</i> species. [b]                                               |
|                       | 1985 | Methicillin resistant strain of <i>Staphylococcus aureus</i> from a blast-injured patient from Baghdad causes nosocomial outbreaks in Dublin hospitals. [c]                                                                                                                                                                                          |
|                       | 1987 | Aarabi (1987) finds that <i>Staphylococcus</i> , <i>Streptococcus</i> and <i>Acinetobacter</i> species were the most prominent pathogens cultured from missile head wounds among Iraqi patients injured in the Iran-Iraq war. [d]                                                                                                                    |
| Iraq Invasion         | 1990 | Sadeghi (1990) detect a marked increase in <i>Pseudomonas</i> , <i>Klebsiella</i> , <i>Enterobacter</i> and <i>Acinetobacter</i> infections in Namazee Hospital, Shiraz, Iran, with “antibiotic sensitivity [that] has diminished dramatically during the 1980s”. Sadeghi attributes this, primarily, to the repercussions of the Iran-Iraq war. [e] |
| U.N. Sanctions        | 1999 | General Basrah Hospital reports nosocomial outbreaks of resistant <i>Pseudomonas aeruginosa</i> . [f]                                                                                                                                                                                                                                                |
|                       | 2002 | High neonatal septicemia in Al-Anbar province attributed to <i>S. aureus</i> , <i>K. pneumoniae</i> , and <i>E. coli</i> , with many strains resistant to commonly-used antibiotics such as ampicillin and cloxacillin. [g]                                                                                                                          |
| U.S. Invasion of Iraq | 2005 | Davis et al. (2005) first describe the wide prevalence of resistant <i>Acinetobacter</i> infections among U.S. soldiers injured during military operations in Iraq. [h]                                                                                                                                                                              |
|                       | 2006 | Genotypically indistinguishable MDR and XDR <i>Acinetobacter baumannii</i> outbreaks begin to be reported in U.S. and U.K. facilities treating casualties of war from Iraq. [i]                                                                                                                                                                      |
|                       | 2007 | Murray et al. (2009) observe “remarkable changes in resistant profiles for <i>A. baumannii</i> , <i>K. pneumoniae</i> and <i>S. aureus</i> ” between 2005 and 2007. [j]                                                                                                                                                                              |
|                       | 2008 | First reported indication of colistin resistance in <i>Enterobacter cloacae</i> and <i>Klebsiella pneumoniae</i> isolates from Iraq. [k]                                                                                                                                                                                                             |
|                       | 2011 | Carbapenem resistance detected in MDR <i>Acinetobacter baumannii</i> isolates collected in Iraq. [l]                                                                                                                                                                                                                                                 |
| ISIS Conflict         | 2016 | Microbiologists in Baghdad isolate XDR and PDR <i>Acinetobacter baumannii</i> among hospitalized patients. [m]                                                                                                                                                                                                                                       |
|                       | 2017 | Emergence of carbapenem resistance in Enterobacteriaceae cultured from wounded military personnel. [n]                                                                                                                                                                                                                                               |
| Current               | 2018 | First reported indication of emergence of NDM-1 and NDM-2 <i>Pseudomonas aeruginosa</i> in Iraqi hospitals [o]                                                                                                                                                                                                                                       |
|                       | 2021 | Researchers in Erbil detect XDR and PDR <i>Pseudomonas aeruginosa</i> . [p]                                                                                                                                                                                                                                                                          |

## REFERENCES

- [a] Al-Jebouri, M. M. (1985). A note on antibiotic resistance in the bacterial flora of raw sewage and sewage-polluted River Tigris in Mosul, Iraq. *Journal of Applied Bacteriology*, 58(4), 401-406.
- [b] Hasony, H. J., & Al-Samaraie, A. G. M. (1989). Bacteremia in Basrah University Teaching Hospital: Incidence, Microbiologic Features, and Therapeutic Pattern. *Annals of Saudi Medicine*, 9(2), 165-170.
- [c] Humphreys, H., Carroll, J. D., Keane, C. T., Cafferkey, M. T., Pomeroy, H. M., & Coleman, D. C. (1990). Importation of methicillin-resistant *Staphylococcus aureus* from Baghdad to Dublin and subsequent nosocomial spread. *Journal of Hospital Infection*, 15(2), 127-135.
- [d] Aarabi, B. (1987). Comparative study of bacteriological contamination between primary and secondary exploration of missile head wounds. *Neurosurgery*, 20(4), 610-616.
- [e] Sadeghi, E. (1990). Type, frequency, and antimicrobial sensitivity pattern of bacteria in an Iranian hospital during the 1980s. *Clinical Infectious Diseases*, 12(3), 543-546.
- [f] Issa, Al-Hamdani, M. H., Aldobon, A. A. H. A., & AbdulAziz, S. M. (1999). Incidence of nosocomial infection of *Pseudomonas aeruginosa* in general Basrah Hospital in Basrah city/IRAQ.
- [g] Al Zwaini, E. J. K. (2002). Neonatal septicaemia in the neonatal care unit, Al-Anbar governorate, Iraq. *EMHJ-Eastern Mediterranean Health Journal*, 8 (4-5), 509-514, 2002.
- [h] Davis, Kepler A., Kimberly A. Moran, C. Kenneth McAllister, and Paula J. Gray. "Multidrug-resistant *Acinetobacter* extremity infections in soldiers." *Emerging infectious diseases* 11, no. 8 (2005): 1218.
- [i] Turton JF, Kaufmann ME, Gill MJ, Pike R, Scott PT, Fishbain J, et al. Comparison of *Acinetobacter baumannii* isolates from the United Kingdom and the United States that were associated with repatriated casualties of the Iraq conflict. *J Clin Microbiol*. 2006;44(7):2630-4.
- [j] Murray, C. K., Yun, H. C., Griffith, M. E., Thompson, B., Crouch, H. K., Monson, L. S., ... & Hospenthal, D. R. (2009). Recovery of multidrug-resistant bacteria from combat personnel evacuated from Iraq and Afghanistan at a single military treatment facility. *Military medicine*, 174(6), 598-604.
- [k] Paolino, K., Erwin, D., Padharia, V., Carrero, H., Giron, L., Burgess, R., ... & Zapor, M. (2007). In vitro activity of colistin against multidrug-resistant gram-negative bacteria isolated at a major army hospital during the military campaigns in Iraq and Afghanistan. *Clinical infectious diseases*, 45(1), 140-141.
- [l] Kusradze, I., Diene, S. M., Goderdzishvili, M., & Rolain, J. M. (2011). Molecular detection of OXA carbapenemase genes in multidrug-resistant *Acinetobacter baumannii* isolates from Iraq and Georgia. *International journal of antimicrobial agents*, 38(2), 164-168.
- [m] Jasim, H. N., Hafidh, R. R., & Abdulmir, A. S. (2018). Formation of therapeutic phage cocktail and endolysin to highly multi-drug resistant *Acinetobacter baumannii*: in vitro and in vivo study. *Iranian journal of basic medical sciences*, 21(11), 1100.
- [n] Mende, K., Beckius, M. L., Zera, W. C., Onmus-Leone, F., Murray, C. C. K., & Tribble, D. R. (2017). Low prevalence of carbapenem-resistant Enterobacteriaceae among wounded military personnel. *US Army Medical Department Journal*, (2-17), 12.

[o] Ismail, S. J., & Mahmoud, S. S. (2018). First detection of New Delhi metallo- $\beta$ -lactamases variants (NDM-1, NDM-2) among *Pseudomonas aeruginosa* isolated from Iraqi hospitals. *Iranian journal of microbiology*, 10(2), 98.

[p] Ali, F. A., Bakir, S. H., Haji, S. H., & Hussien, B. M. (2021). Evaluation of blaGES-5 and bla veb-1 genes with multidrug-resistant extend, pandrug resistance patterns (MDR, XDR, PDR), and biofilm formation in *Pseudomonas aeruginosa* isolates. *Cellular and Molecular Biology*, 67(3), 52-60.
